# Supplementary material for: Arginine methylation promotes translation repression activity of eIF4G-binding protein, Scd6
Source: PubMed Central journal article supplement — Nucleic Acids Res. 2016 Sep 8;44(19):9358–68. doi: 10.1093/nar/gkw762 (PMC5100564; doi:10.1093/nar/gkw762), 2016-09-08
Supplement: supp_gkw762_nar-01620-x-2016-File009.pdf [file supp_gkw762_nar-01620-x-2016-File009.pdf]

## **Supplementary Legends**

**Supplementary table S1:** Plasmids used in this study.

**Supplementary table S2:** Strains used in this study.
